# Supplementary material for: Photoacoustic probes for real-time tracking of endogenous H2S in living mice
Source: Royal Society of Chemistry journal article supplement (doi:10.1039/c6sc04703c), 2016-11-30
Supplement: c6sc04703c1.pdf [file c6sc04703c1.pdf]

## Photoacoustic Probes for Real-Time Tracking of Endogenous H<sub>2</sub>S in Living Mice

Ben Shi, Xianfeng Gu, Qiang Fei, Chunchang Zhao,\*

Key Laboratory for Advanced Materials and Institute of Fine Chemicals, School of Chemistry and Molecular Engineering, East China University of Science & Technology, Shanghai 200237, P. R. China.

Department of Medicinal Chemistry, School of Pharmacy, Fudan University, Shanghai, 201203 China.

### 1. Synthesis.

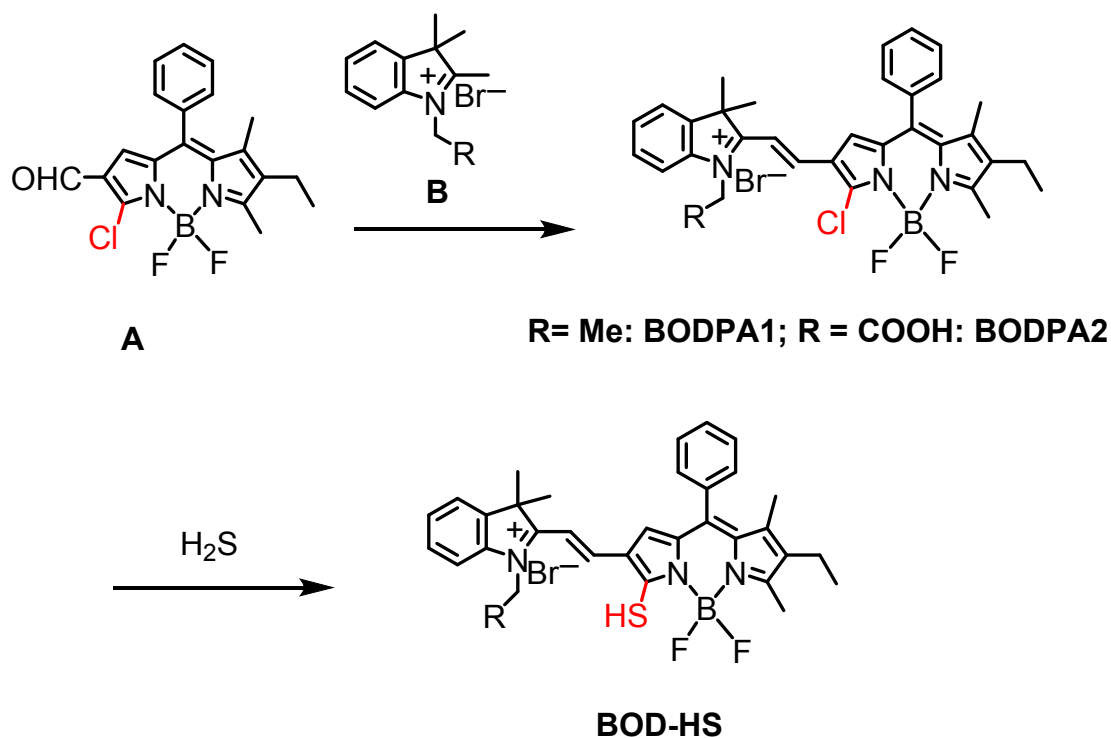

Scheme S1. The synthesis of BODPAs and its reaction with H<sub>2</sub>S.

The solution of **A** (386 mg, 1 mmol) and **B** (298 mg, 1 mmol; R = COOH) in 30 mL absolute ethanol was refluxed for 5 h under N<sub>2</sub>. Subsequently, solvent was removed and the crude was

purified by column to afford 466 mg (70%) BODPA2.  $^1\text{H}$  NMR (400 MHz,  $\text{CDCl}_3$ ):  $\delta$  1.05-1.09 (t,  $J = 8$  Hz, 3H), 1.52 (s, 3H), 1.78 (s, 6H), 2.41 (q,  $J = 8$  Hz, 2H), 2.71 (s, 3H), 4.30 (s, 2H), 7.29 (s, 1H), 7.42-7.44 (m, 2H), 7.49-7.56 (m, 4H), 7.61-7.63 (m, 4H), 8.01-8.05 (d,  $J = 16$  Hz, 1H).  $^{13}\text{C}$  NMR (100 MHz,  $\text{CDCl}_3$ ):  $\delta$  12.8, 13.9, 14.1, 17.3, 22.7, 27.5, 31.6, 31.8, 51.8, 110.5, 114.6, 122.0, 122.3, 123.3, 128.9, 129.2, 129.4, 129.6, 130.5, 131.8, 135.4, 136.2, 139.3, 140.1, 140.6, 141.6, 142.5, 144.0, 144.6, 168.8, 181.1. HRMS: calculated for  $\text{C}_{33}\text{H}_{32}\text{BClF}_2\text{N}_3\text{O}_2$  [ $\text{M}-\text{Br}$ ] $^+$ : 585.2280, found: 585.2272.

## 2. Preparation of Si@BODPAs.

General procedure: BODPAs (0.3  $\mu\text{mol}$ ) were rapidly poured into a solution of mPEG-DSPE (19.1 mg) in 3 mL 0.85 N hydrochloride solution under rigorous stirring, resulting in the formation of nanosized micelles. The in-situ shell cross-linking under acidic conditions with desired amount of silylation agents was carried out at room temperature while kept stirring for 24 h. Then the aqueous solution was dialyzed for 2 days, and the stock solution was thus obtained, which can be diluted to the desired concentration for further studies. The concentration of BODPA1 or BODPA2 in Si@BODPAs was determined according to the standard UV-vis absorption.

The in-situ shell cross-linking under acidic conditions with TBNBr of 5.73 mg (TBNBr/mPEG-DSPE = 30/100, w/w), 17.19 mg (TBNBr/mPEG-DSPE = 90/100, w/w), 34.38 mg (TBNBr/mPEG-DSPE = 180/100, w/w) and 51.57 mg (TBNBr/mPEG-DSPE = 270/100, w/w), afforded water dispersible nanocomposites Si@BODPA30, Si@BODPA90, Si@BODPA180 and Si@BODPA270, respectively.

BODPA1 (0.3  $\mu\text{mol}$ ), mPEG-DSPE (19.1 mg) and TBNBr (34.38 mg) afforded Si@BODPA180(1);

BODPA1 (1.2  $\mu\text{mol}$ ), mPEG-DSPE (19.1 mg) and TBNBr (34.38 mg) afforded Si@BODPA180(4);

BODPA1 (2.1  $\mu\text{mol}$ ), mPEG-DSPE (19.1 mg) and TBNBr (34.38 mg) afforded Si@BODPA180(7).

### **3. *In vivo* imaging.**

HCT116 cells ( $2 \times 10^6$ ) suspended in 200  $\mu\text{l}$  of PBS were subcutaneously injected at the dorsal side location in female nude mice. 3 weeks after implantation, Saline or Si@BODPA180(7) (10 nmol BODPA1) in PBS at a total volume of 200  $\mu\text{l}$  was injected subcutaneously into tumor and normal regions in HCT116 tumor-bearing mice. Photoacoustic images for mice anesthetized with isoflurane were recorded at various times after probe injection using MSOT inVision 128, iThera Medical Germany.

#### 4. HPLC and HRMS were utilized for monitoring the reaction of BODPA2 + NaHS.

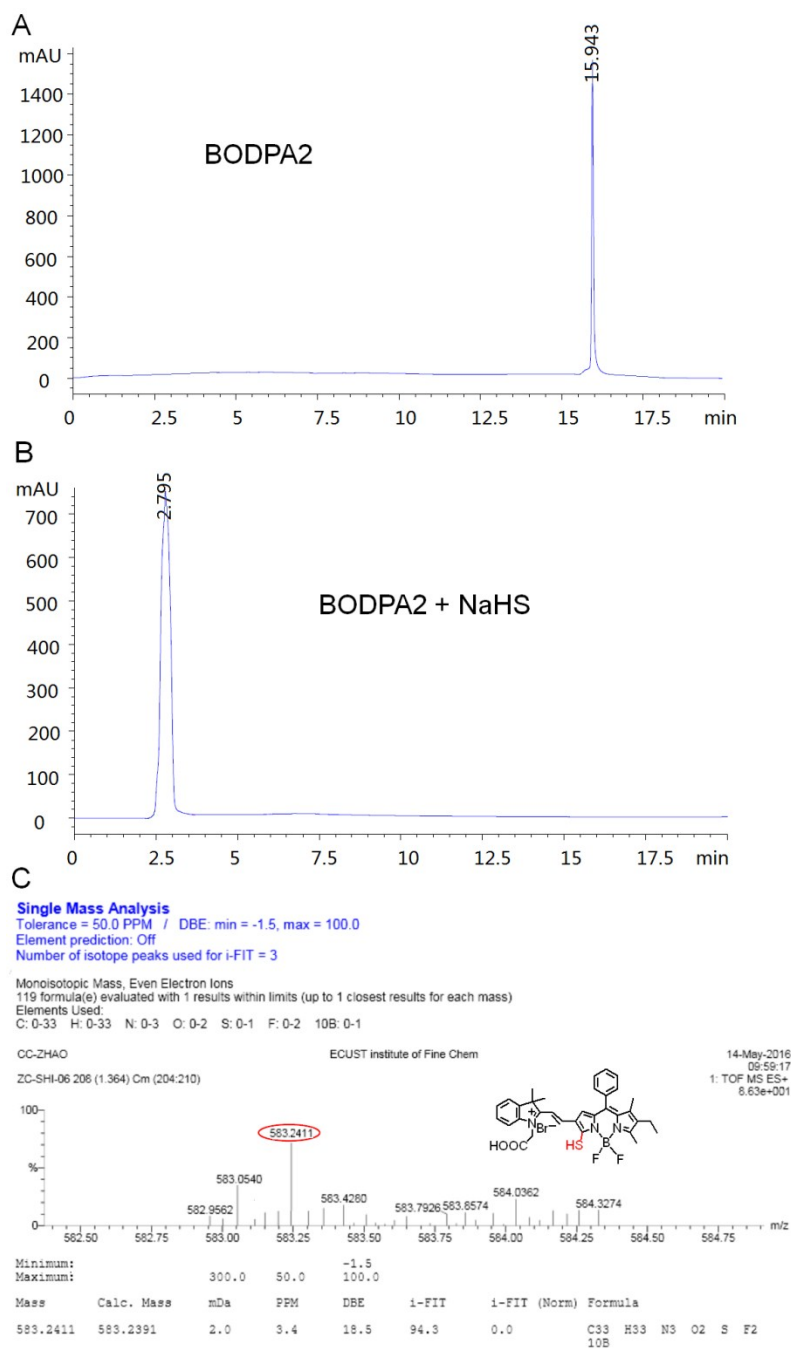

Fig. S1 HPLC profiles of BODPA2 (A) and BODPA2 +NaHS (B). (C) HRMS spectrum of BODPA2 +NaHS. BODPA2 (5  $\mu$ M, HPLC retention time at 15.9 minutes and m/z at 585.2272) proceeded  $S_NAr$  with  $H_2S$  and was efficiently converted to sulfide-substituted BODIPY (HPLC retention time at 2.8 minutes and m/z at 583.2411).

## 5. Time-dependent spectra changes of BODPAs in the presence of NaHS.

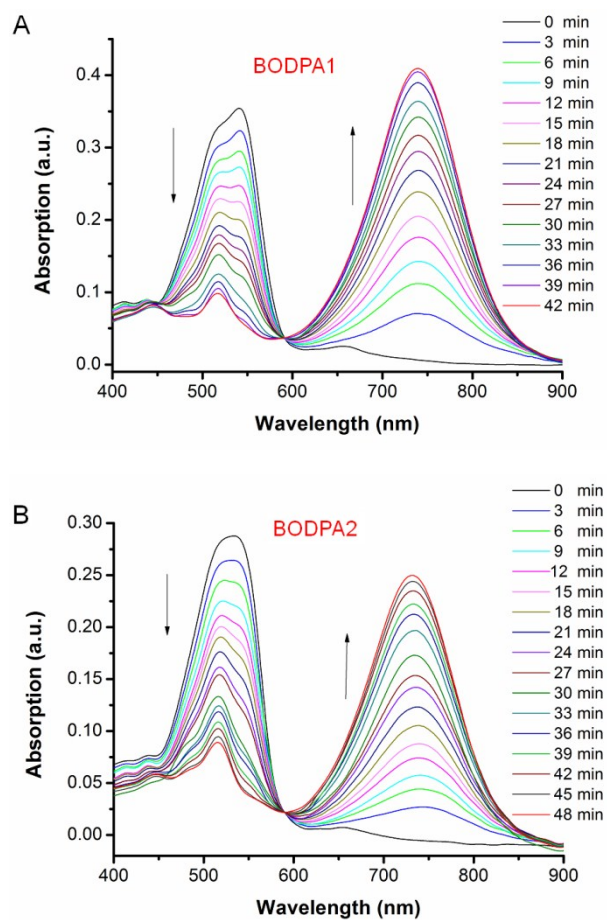

Fig. S2 Time-dependent absorption spectra changes of (A) BODPA1 (10  $\mu$ M) and (B) BODPA2 (10  $\mu$ M) in the presence of NaHS (100  $\mu$ M) under model conditions (acetonitrile/PBS buffer, 1:1, v/v, 20 mM, pH 7.4, room temperature).

## 6. DLS and TEM characterizations.

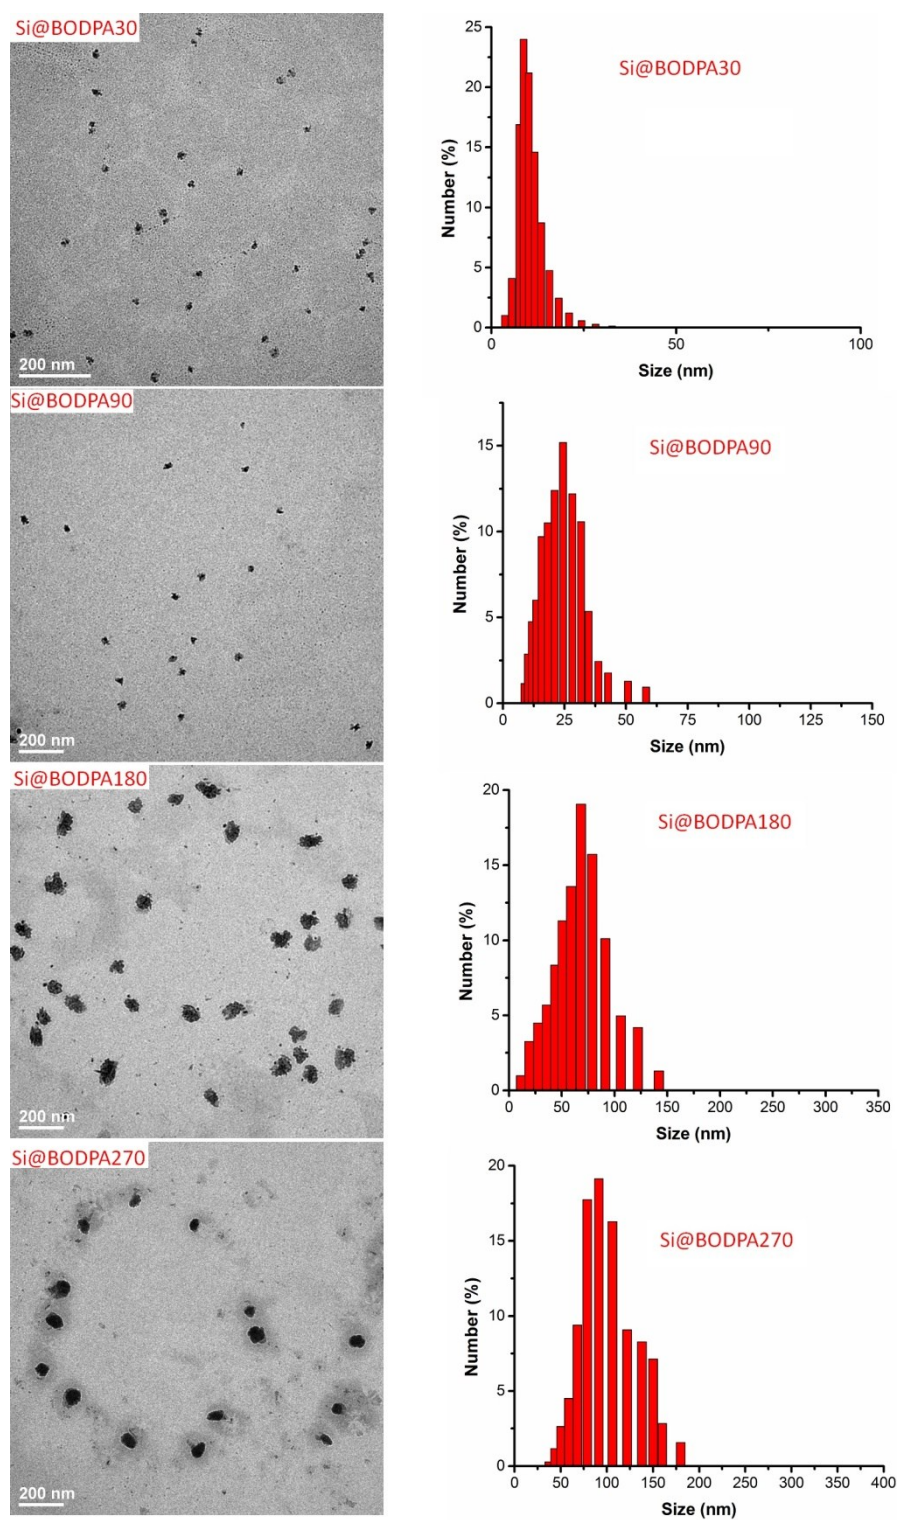

Fig. S3 Dynamic light scattering and TEM measurements for evaluation of the average size of Si@BODPAs.

## 7. Time-dependent spectra changes of Si@BODPAs in the presence of NaHS.

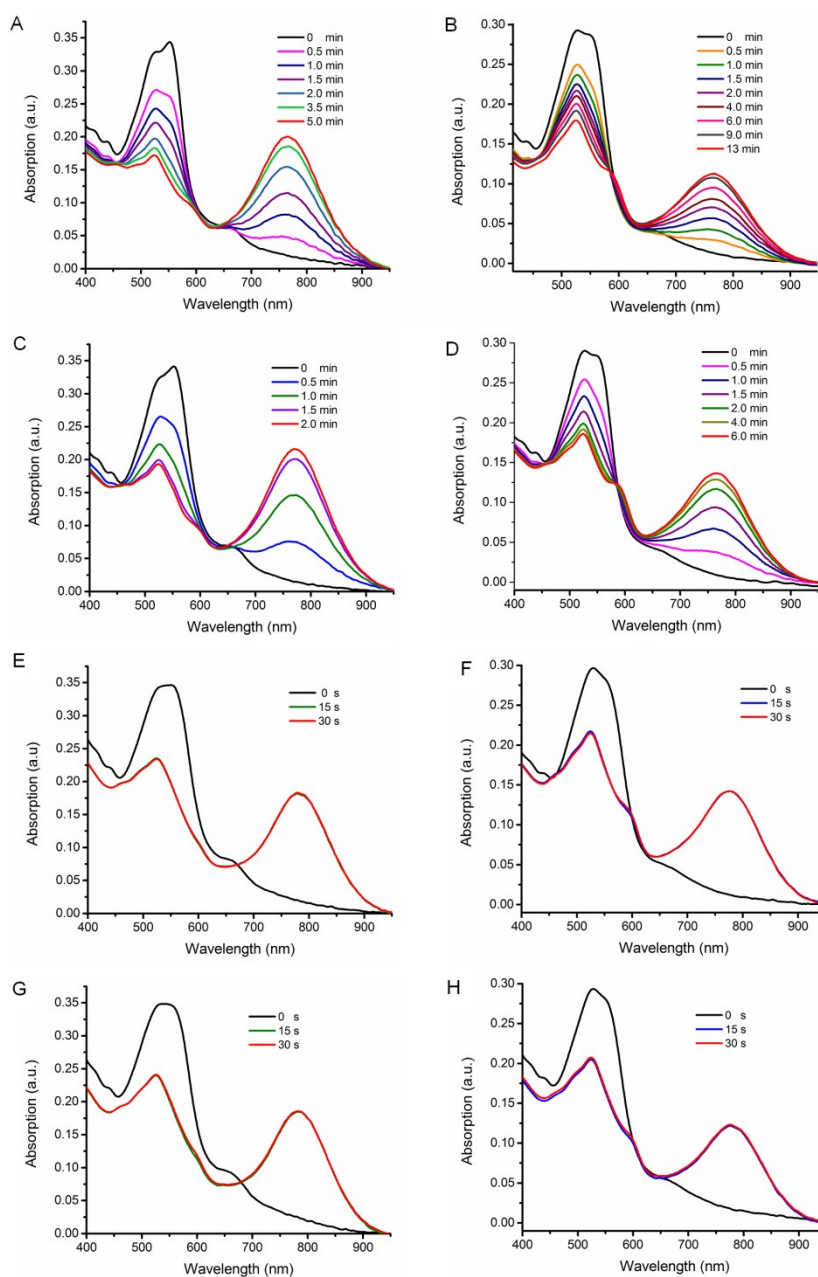

Fig. S4 Time-dependent absorption spectra changes of (A) Si@BODPA30 (10  $\mu$ M BODPA1), (B) Si@BODPA30 (10  $\mu$ M BODPA2), (C) Si@BODPA90 (10  $\mu$ M BODPA1), (D) Si@BODPA90 (10  $\mu$ M BODPA2), (E) Si@BODPA180 (10  $\mu$ M BODPA1), (F) Si@BODPA180 (10  $\mu$ M BODPA2), (G) Si@BODPA270 (10  $\mu$ M BODPA1) and (H) Si@BODPA270 (10  $\mu$ M BODPA2) in the presence of NaHS (100  $\mu$ M) in PBS (pH 7.4) at room temperature.

## 8. EDX characterizations.

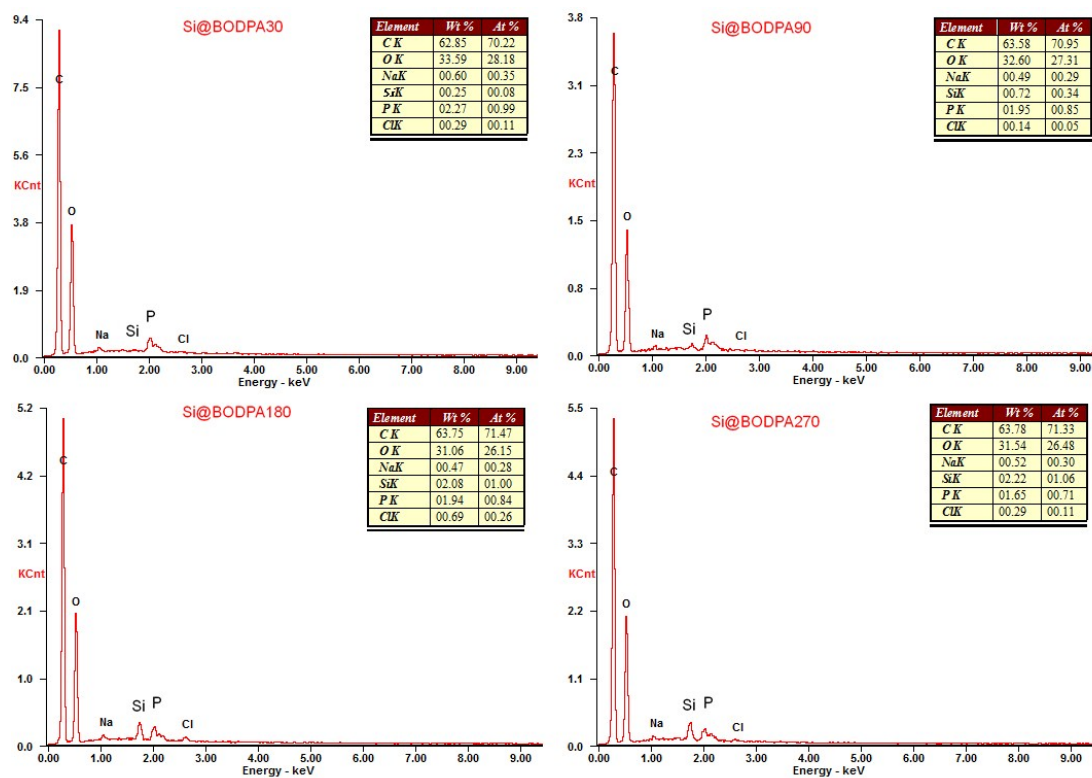

Fig. S5 The energy dispersive X-ray spectrum for demonstrating the existence of silica shell.



### 9. The selectivity of Si@BODPA180(7) to H<sub>2</sub>S over related analytes.

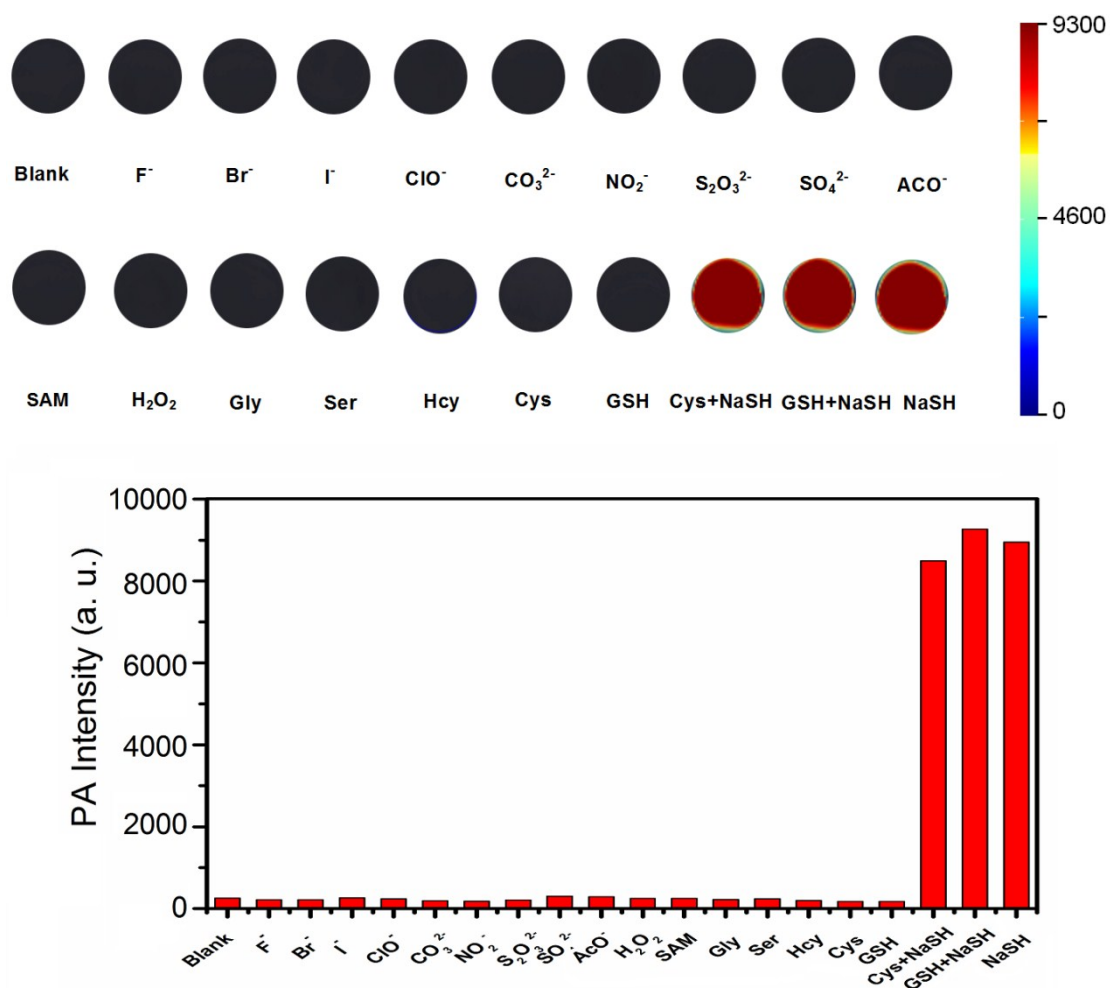

Fig. S6 PA responses of Si@BODPA180(7) to 100  $\mu$ M NaHS and other biologically relevant competing analytes in PBS (pH 7.4) at room temperature. Data shown are for 1 mM glutathione, 1 mM cysteine, and 100  $\mu$ M for other analytes. It should be mentioned that GSH and Cys had minimal influence on the PA responsiveness. SAM: S-adenosyl-L-methionine.

## 10. NMR and HRMS characterization.

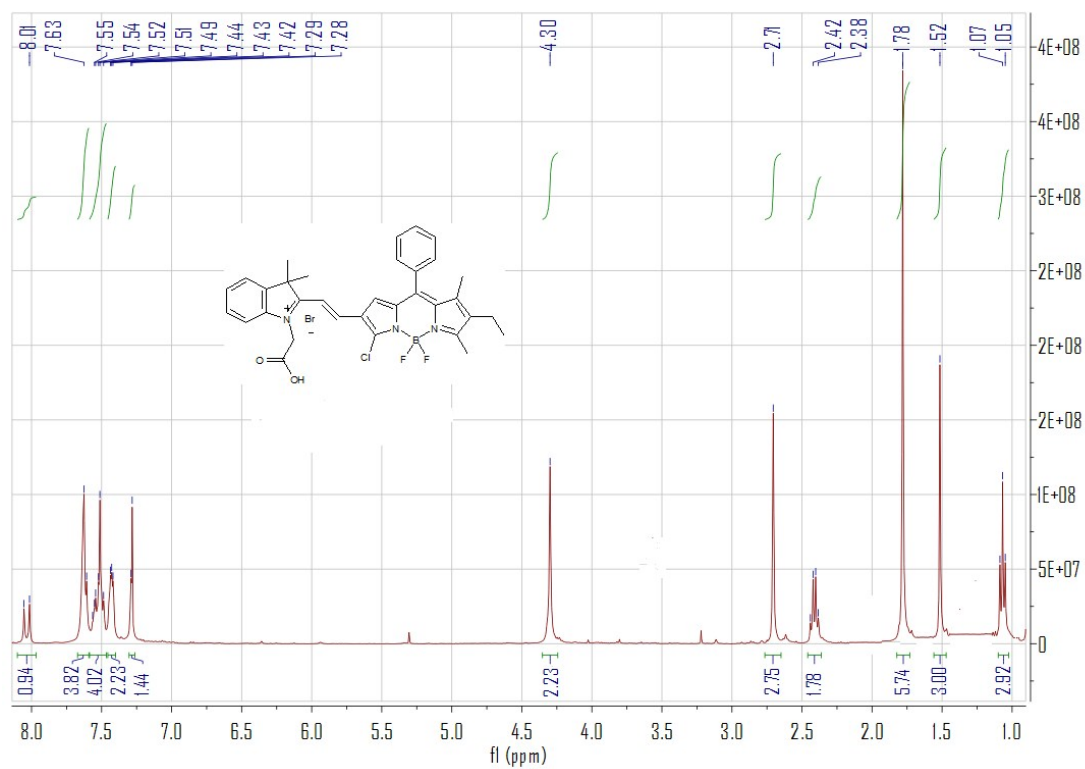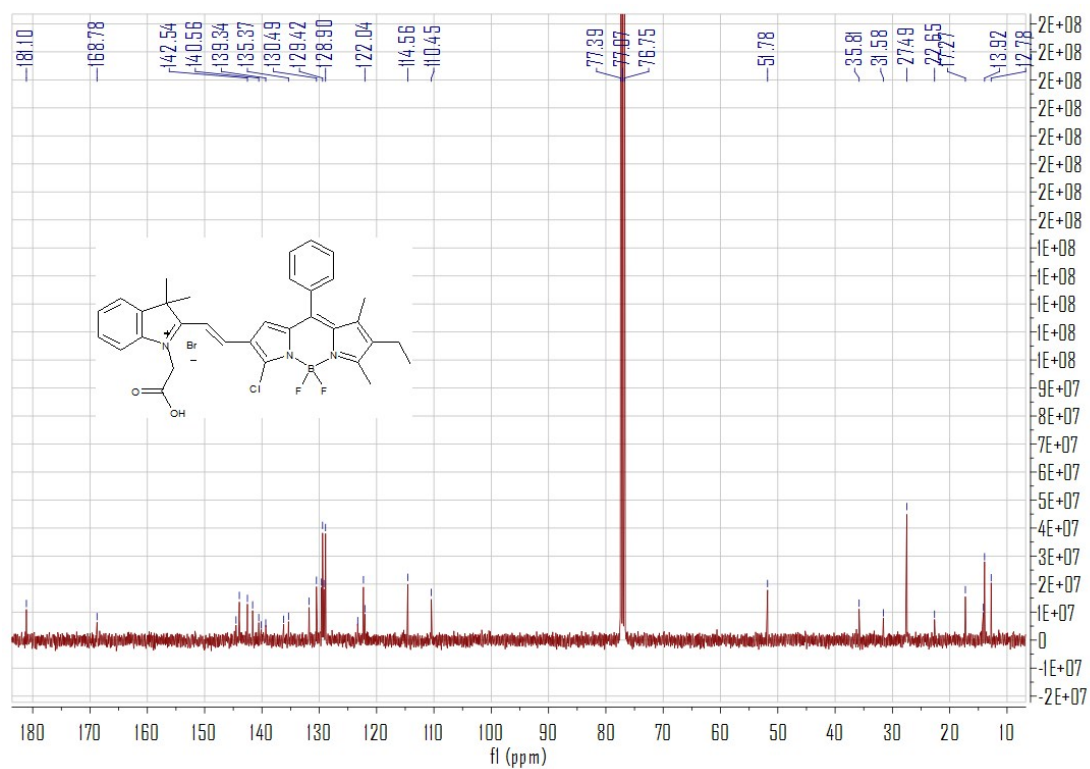

### Single Mass Analysis

Tolerance = 50.0 PPM / DBE: min = -1.5, max = 100.0

Element prediction: Off

Number of isotope peaks used for i-FIT = 3

Monoisotopic Mass, Even Electron Ions

50 formula(e) evaluated with 1 results within limits (up to 1 closest results for each mass)

Elements Used:

C: 0-33 H: 0-40 N: 0-3 O: 0-2 Cl: 1-1 F: 0-2 10B: 0-1

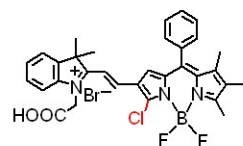

CC-ZHAO

ECUST institute of Fine Chem

08-Apr-2016

22:49:25

1: TOF MS ES+

3.08e+002

ZC-SHI-04 153 (1.031) Cm (148:154)

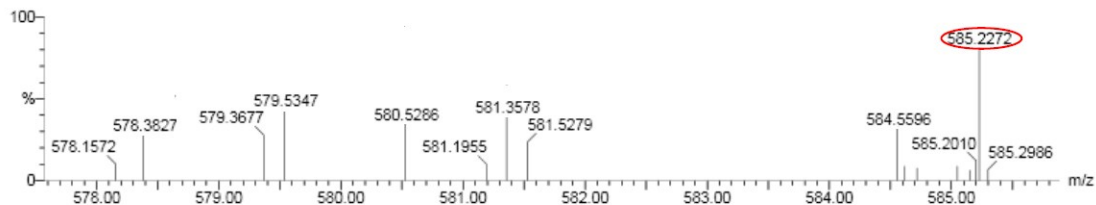

Minimum:

Maximum:

300.0

50.0

-1.5

100.0

| Mass     | Calc. Mass | mDa  | PPM  | DBE  | i-FIT | i-FIT (Norm) | Formula                    |
|----------|------------|------|------|------|-------|--------------|----------------------------|
| 585.2272 | 585.2280   | -0.8 | -1.4 | 18.5 | 27.3  | 0.0          | C33 H32 N3 O2 Cl F2<br>10B |
